# Supplementary material for: A 2D→3D net with coexistence of polycatenation and polythreading constructed by long rigid and flexible ligands
Source: Royal Society of Chemistry journal article supplement (doi:10.1039/c2ce25911g), 2012-01-01
Supplement: c2ce25911g.pdf [file c2ce25911g.pdf]

## Electronic Supplementary Information (ESI)

### A 2D→3D net with coexistence of polycatenation and polythreading constructed by long rigid and flexible ligands

Fang-Hua Zhao, Yun-Xia Che and Ji-Min Zheng\*

Department of Chemistry, Nankai University, Tianjin 300071, P. R. China.

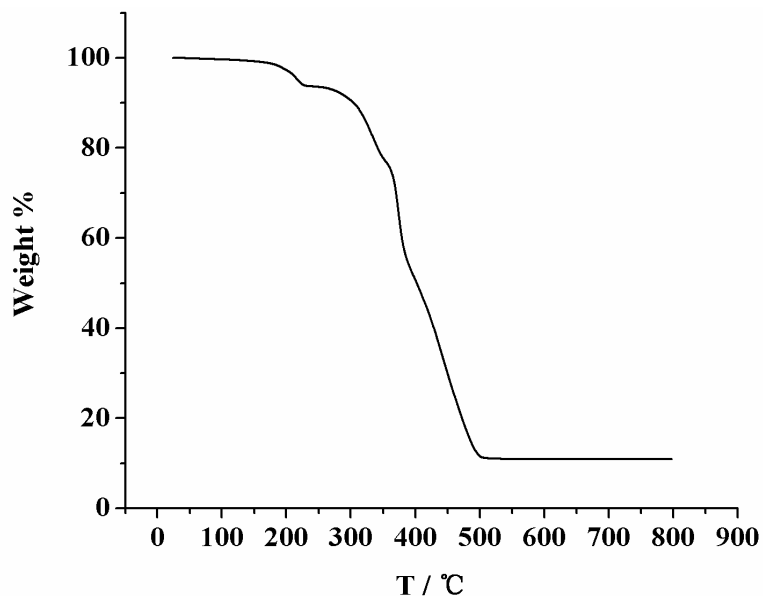

Fig. S1. The TG diagram of **1**.

**Table S1** Selected bond lengths (Å) and angles (°) for **1**

|                 |            |                 |            |                 |            |
|-----------------|------------|-----------------|------------|-----------------|------------|
| Ni(1)-O(1)      | 2.0915(14) | Ni(1)-O(2)      | 2.2247(15) | Ni(1)-O(5)      | 2.0600(14) |
| Ni(1)-N(1)      | 2.0976(17) | Ni(1)-N(4)      | 2.0905(17) | Ni(1)-N(5)      | 2.0575(18) |
| O(1)-Ni(1)-N(1) | 88.16(6)   | O(5)-Ni(1)-O(2) | 102.72(6)  | N(5)-Ni(1)-N(1) | 94.91(7)   |
| O(1)-Ni(1)-O(2) | 61.05(6)   | N(1)-Ni(1)-O(2) | 84.20(6)   | N(5)-Ni(1)-N(4) | 90.95(7)   |
| O(5)-Ni(1)-N(1) | 91.49(6)   | N(4)-Ni(1)-N(1) | 174.00(6)  | N(5)-Ni(1)-O(1) | 98.10(7)   |
| O(5)-Ni(1)-N(4) | 88.94(6)   | N(4)-Ni(1)-O(1) | 89.75(6)   | N(5)-Ni(1)-O(2) | 159.13(6)  |
| O(5)-Ni(1)-O(1) | 163.72(5)  | N(4)-Ni(1)-O(2) | 89.87(6)   | N(5)-Ni(1)-O(5) | 98.15(7)   |

**Table S2.** Hydrogen bond lengths (Å) and angles (°) for **1**

| D-H...A             | d(D-H) | d(H...A) | d(D...A)  | ∠(D-H...A) |
|---------------------|--------|----------|-----------|------------|
| O(5)-H(5C)...O(2)#7 | 0.85   | 1.94     | 2.780(2)  | 167.4      |
| O(5)-H(5D)...O(3)#6 | 0.87   | 1.79     | 2.639(2)  | 165.5      |
| O(6)-H(6C)...O(1)   | 0.86   | 1.89     | 2.745(2)  | 174.3      |
| O(6)-H(6D)...O(3)#5 | 0.85   | 1.91     | 2.751(2)  | 167.1      |
| O(7)-H(7B)...O(3)#4 | 0.84   | 2.7      | 3.187(10) | 118.4      |
